# Supplementary material for: The unquantified mass loss of Northern Hemisphere marine-terminating glaciers from 2000–2020
Source: PubMed Central journal article supplement (PMC9553960; doi:10.1038/s41467-022-33231-x), 2022-10-11
Supplement: 41467_2022_33231_MOESM3_ESM.pdf [file 41467_2022_33231_MOESM3_ESM.pdf]

## **Description of Additional Supplementary Files**

File Name: Supplementary Data 1

Description: Raw data used to calculate the calving flux for every glacier. See table header and Materials and Methods section for more details.
